# Supplementary material for: De novo genome assembly and annotation of rice sheath rot fungus Sarocladium oryzae reveals genes involved in Helvolic acid and Cerulenin biosynthesis pathways
Source: PubMed Central journal article supplement (PMC4815069; doi:10.1186/s12864-016-2599-0), 2016-03-31

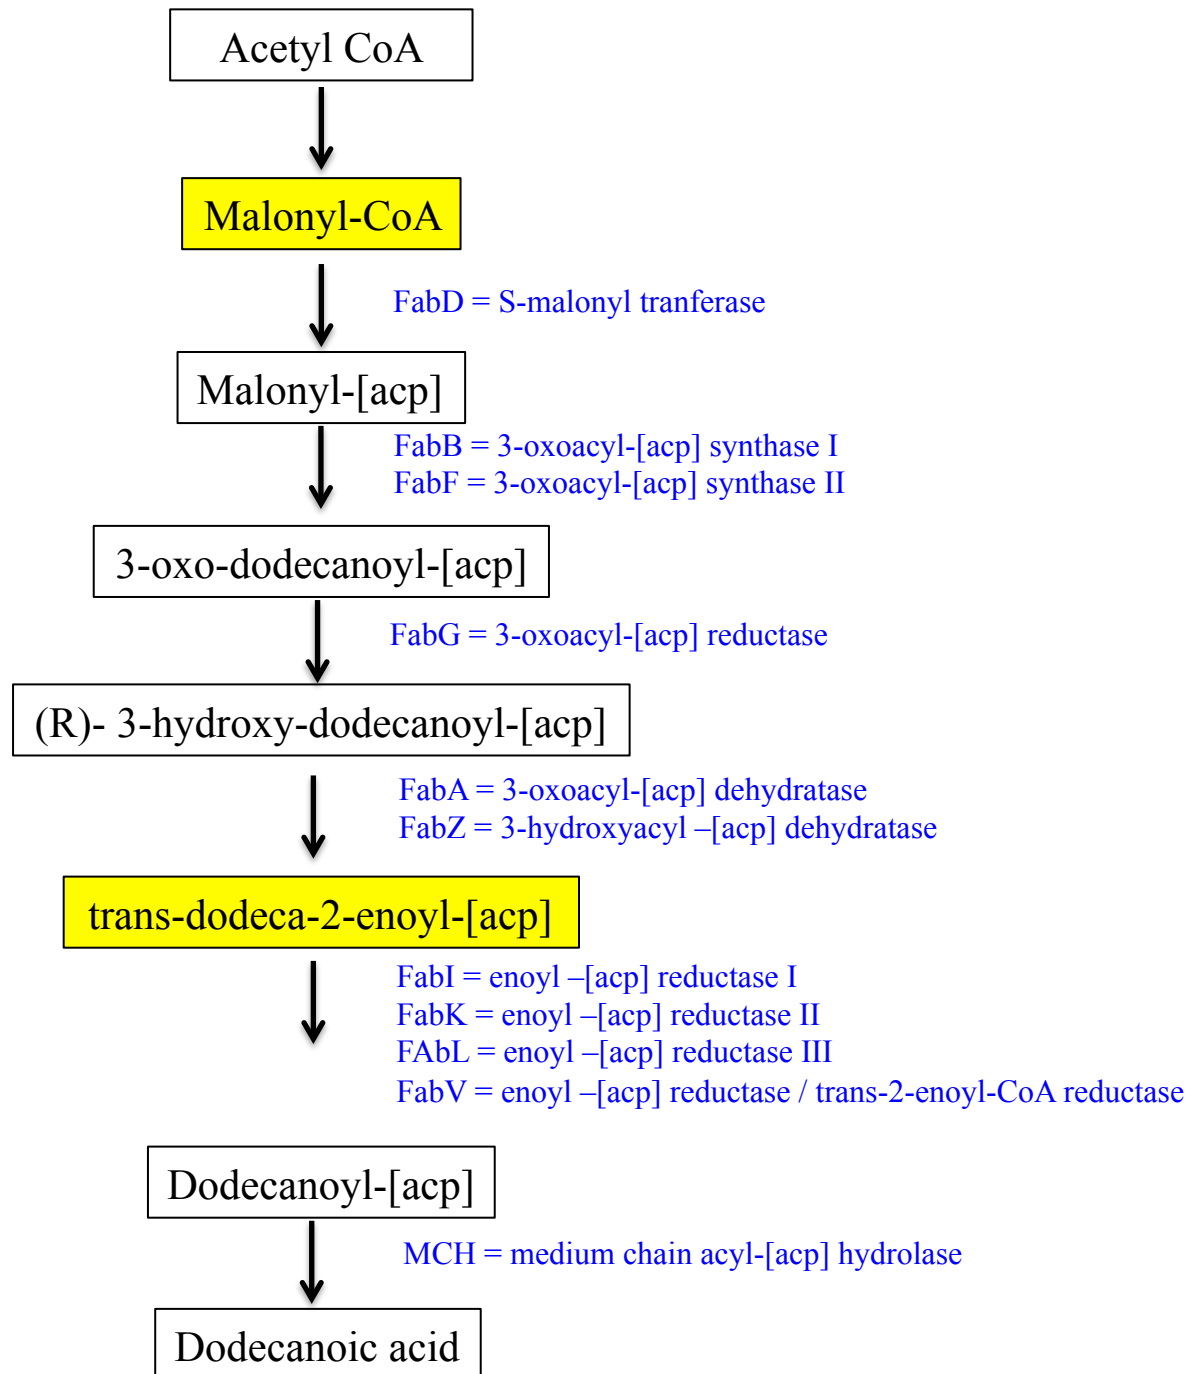

Supplement: 12864_2016_2599_MOESM11_ESM.pdf [file 12864_2016_2599_MOESM11_ESM.pdf]
